# Supplementary material
Source: publisher figshare collection journal article supplement (https://frontiersin.figshare.com/ndownloader/files/24951488)
Supplement: Supplementary file [file 24951488]

## Methods of characterizing DHI

The chromatographic fingerprint of DHI and the quantification of salvianolic acid A (SaA), salvianolic acid B (SaB), rosmarinic acid (RA), tanshinol (danshensu, DSS), protocatechuic aldehyde (PA), caffeic acid (CA) and lithospermic acid (LA) was performed on ultra-high-performance liquid chromatography coupled with photo-diode array and quadrupole time of flight mass spectrometry (UHPLC-PDA-QTOF/MS; Waters Corp., Milford, USA). The separation was conducted on an Acquity UPLC BEH C 18 column (100 mm × 2.1 mm, 1.7 μm; Waters), and the mobile phase consisted of water-formic acid (A; 100:0.1, v/v) and acetonitrile (B). The conditions of gradient eluting were optimized as follows: 5-40% B (0-9.0 min), 40-80% B (9.0-10.0 min), 80-80% B (10.0-12.0 min), 80-5% B (12.0-12.5 min). The flow rate was 0.4 ml/min and the injection volume was 1 μl. The analytical method of quantification was validated by linearity, recovery, inter-day and intra-day precision, and short-term stability.

## Figure legends

**Supplementary Figure 1** Typical UPLC-PDA fingerprint BPI chromatogram of DHI (Lot Number: 13042014) and chromatographic peaks for salvianolic acid A (SaA), salvianolic acid B (SaB), rosmarinic acid (RA), tanshinol (danshensu, DSS), protocatechuic aldehyde (PA), caffeic acid (CA) and lithospermic acid (LA).

**Supplementary Figure 2** Chemical structures of salvianolic acid A (SaA), salvianolic acid B (SaB), rosmarinic acid (RA), tanshinol (danshensu, DSS), protocatechuic aldehyde (PA), caffeic acid (CA) and lithospermic acid (LA).

**Supplementary Figure 3** Gene transcription levels of *MRP4*, *MDR1* and *MCT1*.

**Supplementary Figure 4** CT value of *β-Actin* gene amplification in qPCR analysis when ASA was used in combination with DHI in rats.

**Supplementary Table 1 Primers of MCT1, MDR1 and MRP4**

| <b>Primer</b> | <b>Sequence (5'-3')</b> |
|---------------|-------------------------|
| MCT1-S        | GTATGCCGGAGGTCCTATC     |
| MCT1-AS       | AAGCTGCAATCAAGCCACAG    |
| MRP4-S        | CCGACACTCAGGAACCGAAC    |
| MRP4-AS       | TTCTCTGCATCTTGGGCATCTG  |
| MDR1-S        | CGTCATCGTGGAGCAAGGAA    |
| MDR1-AS       | ATTGGTTTCCACATCCAGCCT   |
